# Supplementary material
Source: MDPI journal article supplement (https://www.mdpi.com/2079-9292/13/9/1679)
Supplement: s1 [file s1 › electronics-2848898-supplementary.pdf]

Supporting information for

## Comparative study on Schottky contact behaviors between Ga- and N-polar GaN with SiN<sub>x</sub> interlayer

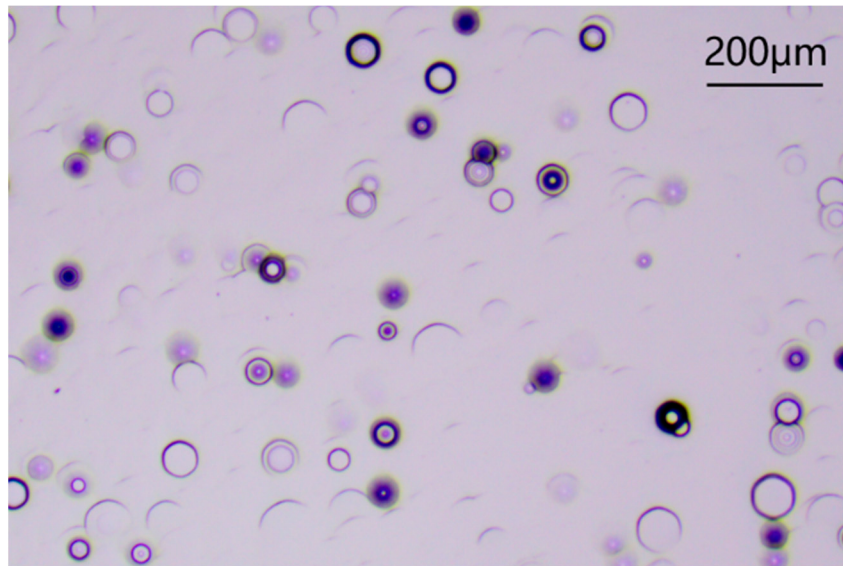

**Figure S1.** Optical microscope image showing the distribution and density of the hillocks on N-polar GaN

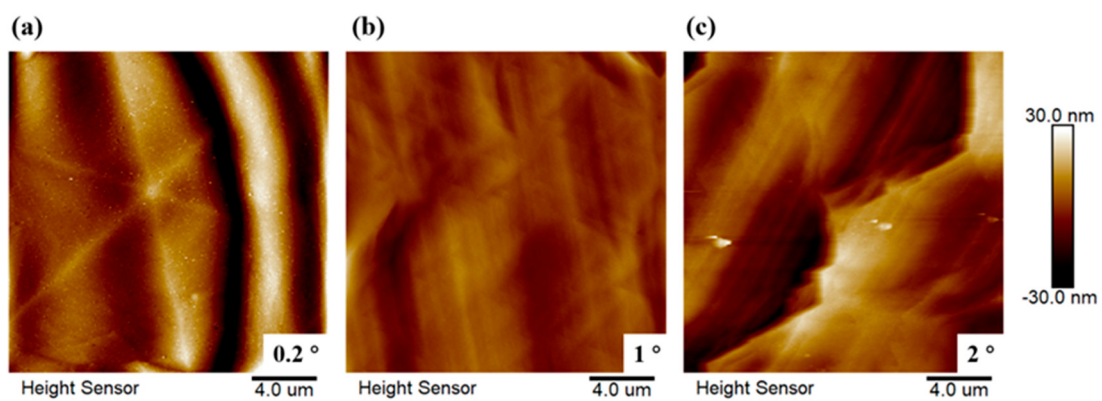

**Figure S2.** Surface morphologies of N-polar GaN grown on 0.2°, 1° and 2° misoriented substrate.

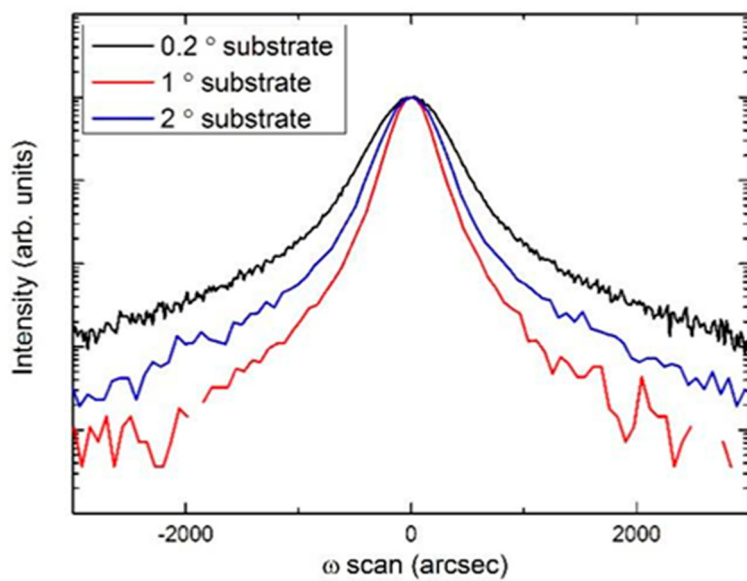

**Figure S3.** XRD (002) rocking curves of N-GaN grown on sapphire with various misorientation angles.

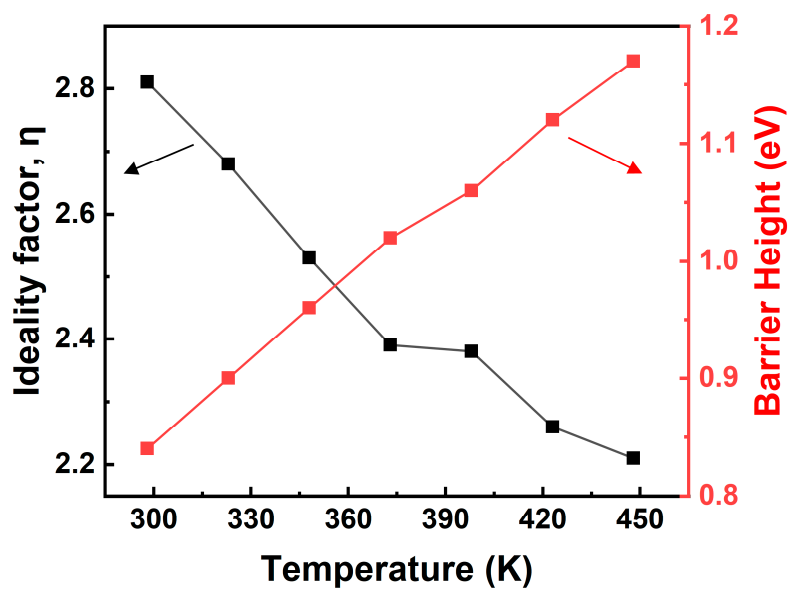

**Figure S4.** Temperature-dependent ideality factor and barrier height of Ga-polar MIS Schottky barrier height.
